# Supplementary material for: Charakteristika und Dynamik der stationären Behandlung von Parkinson-Patienten in Deutschland
Source: Springer Nature journal article supplement (doi:10.1007/s00115-018-0590-5), 2018-08-06
Supplement: MOESM4 [file 16012400]

## Sheet: G20_Nebendiagnosen
Supplementary Material: Tabelle
Vorkommen der 50 häufigsten Nebendiagnosen in den Sub-Kategorien des primären Parkinson-Syndroms (G20.-) im Jahr 2015
Hauptdiagnose G20.00			Hauptdiagnose G20.01			Hauptdiagnose G20.10			Hauptdiagnose G20.11			Hauptdiagnose G20.20			Hauptdiagnose G20.21			Hauptdiagnose G20.90			Hauptdiagnose G20.91
Nebendiagnose	Quote	Bezeichnung	Nebendiagnose	Quote	Bezeichnung	Nebendiagnose	Quote	Bezeichnung	Nebendiagnose	Quote	Bezeichnung	Nebendiagnose	Quote	Bezeichnung	Nebendiagnose	Quote	Bezeichnung	Nebendiagnose	Quote	Bezeichnung	Nebendiagnose	Quote	Bezeichnung
I10	0.515706	Essentielle (primäre) Hypertonie	I10	0.478346	Essentielle (primäre) Hypertonie	I10	0.532281	Essentielle (primäre) Hypertonie	I10	0.449946	Essentielle (primäre) Hypertonie	I10	0.486094	Essentielle (primäre) Hypertonie	I10	0.403501	Essentielle (primäre) Hypertonie	I10	0.531002	Essentielle (primäre) Hypertonie	I10	0.530899	Essentielle (primäre) Hypertonie
E11	0.178115	Diabetes mellitus, Typ 2	R47	0.151575	Sprech- und Sprachstörungen, anderenorts nicht klassifiziert	Z74	0.235294	Probleme mit Bezug auf Pflegebedürftigkeit	Z74	0.242656	Probleme mit Bezug auf Pflegebedürftigkeit	Z74	0.439317	Probleme mit Bezug auf Pflegebedürftigkeit	Z74	0.360957	Probleme mit Bezug auf Pflegebedürftigkeit	Z74	0.255951	Probleme mit Bezug auf Pflegebedürftigkeit	Z74	0.285112	Probleme mit Bezug auf Pflegebedürftigkeit
E78	0.164308	Störungen des Lipoproteinstoffwechsels und sonstige Lipidämien	Z74	0.149606	Probleme mit Bezug auf Pflegebedürftigkeit	N39	0.213442	Sonstige Krankheiten des Harnsystems	F06	0.235901	Andere psychische Störungen aufgrund einer Schädigung oder Funktionsstörung des Gehirns oder einer körperlichen Krankheit	N39	0.392541	Sonstige Krankheiten des Harnsystems	N39	0.325061	Sonstige Krankheiten des Harnsystems	R26	0.240964	Störungen des Ganges und der Mobilität	N39	0.232444	Sonstige Krankheiten des Harnsystems
R26	0.140835	Störungen des Ganges und der Mobilität	E78	0.147638	Störungen des Lipoproteinstoffwechsels und sonstige Lipidämien	E11	0.20075	Diabetes mellitus, Typ 2	N39	0.222456	Sonstige Krankheiten des Harnsystems	F02	0.368521	Demenz bei anderenorts klassifizierten Krankheiten	F02	0.315311	Demenz bei anderenorts klassifizierten Krankheiten	E11	0.222157	Diabetes mellitus, Typ 2	R26	0.229635	Störungen des Ganges und der Mobilität
Z92	0.132206	Medizinische Behandlung in der Eigenanamnese	Z92	0.146982	Medizinische Behandlung in der Eigenanamnese	F02	0.191701	Demenz bei anderenorts klassifizierten Krankheiten	R26	0.214363	Störungen des Ganges und der Mobilität	R15	0.264855	Stuhlinkontinenz	F06	0.313539	Andere psychische Störungen aufgrund einer Schädigung oder Funktionsstörung des Gehirns oder einer körperlichen Krankheit	N39	0.211578	Sonstige Krankheiten des Harnsystems	E11	0.213483	Diabetes mellitus, Typ 2
Z74	0.119779	Probleme mit Bezug auf Pflegebedürftigkeit	E11	0.145669	Diabetes mellitus, Typ 2	R26	0.190156	Störungen des Ganges und der Mobilität	R47	0.191423	Sprech- und Sprachstörungen, anderenorts nicht klassifiziert	R13	0.257901	Dysphagie	R47	0.235763	Sprech- und Sprachstörungen, anderenorts nicht klassifiziert	U50	0.200118	Motorische Funktionseinschränkung	U50	0.204354	Motorische Funktionseinschränkung
I25	0.115637	Chronische ischämische Herzkrankheit	R26	0.144357	Störungen des Ganges und der Mobilität	R47	0.162013	Sprech- und Sprachstörungen, anderenorts nicht klassifiziert	F02	0.175492	Demenz bei anderenorts klassifizierten Krankheiten	R47	0.241466	Sprech- und Sprachstörungen, anderenorts nicht klassifiziert	R26	0.193884	Störungen des Ganges und der Mobilität	R32	0.182192	Nicht näher bezeichnete Harninkontinenz	E87	0.194522	Sonstige Störungen des Wasser- und Elektrolythaushaltes sowie des Säure-Basen-Gleichgewichts
R47	0.109424	Sprech- und Sprachstörungen, anderenorts nicht klassifiziert	N39	0.129921	Sonstige Krankheiten des Harnsystems	F06	0.161903	Andere psychische Störungen aufgrund einer Schädigung oder Funktionsstörung des Gehirns oder einer körperlichen Krankheit	E11	0.143312	Diabetes mellitus, Typ 2	R26	0.233881	Störungen des Ganges und der Mobilität	R32	0.188566	Nicht näher bezeichnete Harninkontinenz	E87	0.174846	Sonstige Störungen des Wasser- und Elektrolythaushaltes sowie des Säure-Basen-Gleichgewichts	E86	0.172753	Volumenmangel
N39	0.106662	Sonstige Krankheiten des Harnsystems	F32	0.124016	Depressive Episode	U50	0.154839	Motorische Funktionseinschränkung	U50	0.142484	Motorische Funktionseinschränkung	R32	0.224399	Nicht näher bezeichnete Harninkontinenz	R13	0.182584	Dysphagie	F02	0.150749	Demenz bei anderenorts klassifizierten Krankheiten	R32	0.169944	Nicht näher bezeichnete Harninkontinenz
F32	0.105627	Depressive Episode	I25	0.108924	Chronische ischämische Herzkrankheit	Z92	0.148107	Medizinische Behandlung in der Eigenanamnese	K59	0.137896	Sonstige funktionelle Darmstörungen	E11	0.218078	Diabetes mellitus, Typ 2	R15	0.171948	Stuhlinkontinenz	Z92	0.148105	Medizinische Behandlung in der Eigenanamnese	Z92	0.166433	Medizinische Behandlung in der Eigenanamnese
U50	0.0997584	Motorische Funktionseinschränkung	G47	0.103675	Schlafstörungen	E78	0.13365	Störungen des Lipoproteinstoffwechsels und sonstige Lipidämien	Z92	0.125661	Medizinische Behandlung in der Eigenanamnese	U50	0.213654	Motorische Funktionseinschränkung	G25	0.160204	Sonstige extrapyramidale Krankheiten und Bewegungsstörungen	I48	0.147517	Vorhofflimmern und Vorhofflattern	N18	0.145365	Chronische Nierenkrankheit
E03	0.0911288	Sonstige Hypothyreose	F06	0.0990814	Andere psychische Störungen aufgrund einer Schädigung oder Funktionsstörung des Gehirns oder einer körperlichen Krankheit	I25	0.125152	Chronische ischämische Herzkrankheit	G25	0.125597	Sonstige extrapyramidale Krankheiten und Bewegungsstörungen	E87	0.204172	Sonstige Störungen des Wasser- und Elektrolythaushaltes sowie des Säure-Basen-Gleichgewichts	E87	0.148017	Sonstige Störungen des Wasser- und Elektrolythaushaltes sowie des Säure-Basen-Gleichgewichts	E78	0.147223	Störungen des Lipoproteinstoffwechsels und sonstige Lipidämien	F02	0.143258	Demenz bei anderenorts klassifizierten Krankheiten
I48	0.0883673	Vorhofflimmern und Vorhofflattern	E87	0.0892388	Sonstige Störungen des Wasser- und Elektrolythaushaltes sowie des Säure-Basen-Gleichgewichts	F32	0.117978	Depressive Episode	F32	0.117441	Depressive Episode	E86	0.200379	Volumenmangel	E11	0.139375	Diabetes mellitus, Typ 2	I25	0.143403	Chronische ischämische Herzkrankheit	E78	0.141854	Störungen des Lipoproteinstoffwechsels und sonstige Lipidämien
F02	0.0876769	Demenz bei anderenorts klassifizierten Krankheiten	Z95	0.0879265	Vorhandensein von kardialen oder vaskulären Implantaten oder Transplantaten	E87	0.114115	Sonstige Störungen des Wasser- und Elektrolythaushaltes sowie des Säure-Basen-Gleichgewichts	I25	0.111451	Chronische ischämische Herzkrankheit	F06	0.196587	Andere psychische Störungen aufgrund einer Schädigung oder Funktionsstörung des Gehirns oder einer körperlichen Krankheit	E86	0.131841	Volumenmangel	E86	0.142227	Volumenmangel	F32	0.130618	Depressive Episode
I67	0.0818088	Sonstige zerebrovaskuläre Krankheiten	I48	0.0846457	Vorhofflimmern und Vorhofflattern	K59	0.113122	Sonstige funktionelle Darmstörungen	G47	0.109858	Schlafstörungen	L89	0.172566	Dekubitalgeschwür und Druckzone	U50	0.125415	Motorische Funktionseinschränkung	R15	0.135175	Stuhlinkontinenz	R15	0.126404	Stuhlinkontinenz
G62	0.0800828	Sonstige Polyneuropathien	U50	0.0826772	Motorische Funktionseinschränkung	I48	0.108818	Vorhofflimmern und Vorhofflattern	R32	0.108647	Nicht näher bezeichnete Harninkontinenz	B96	0.151075	Sonstige näher bezeichnete Bakterien als Ursache von Krankheiten, die in anderen Kapiteln klassifiziert sind	Z96	0.12187	Vorhandensein von anderen funktionellen Implantaten	F32	0.125771	Depressive Episode	I25	0.122893	Chronische ischämische Herzkrankheit
Z95	0.0787021	Vorhandensein von kardialen oder vaskulären Implantaten oder Transplantaten	F02	0.0813648	Demenz bei anderenorts klassifizierten Krankheiten	I67	0.102307	Sonstige zerebrovaskuläre Krankheiten	E78	0.108074	Störungen des Lipoproteinstoffwechsels und sonstige Lipidämien	I48	0.142857	Vorhofflimmern und Vorhofflattern	L89	0.116331	Dekubitalgeschwür und Druckzone	N18	0.124302	Chronische Nierenkrankheit	I48	0.121489	Vorhofflimmern und Vorhofflattern
G47	0.0783569	Schlafstörungen	E53	0.078084	Mangel an sonstigen Vitaminen des Vitamin-B-Komplexes	R32	0.100872	Nicht näher bezeichnete Harninkontinenz	R29	0.0958389	Sonstige Symptome, die das Nervensystem und das Muskel-Skelett-System betreffen	I50	0.140961	Herzinsuffizienz	K59	0.115223	Sonstige funktionelle Darmstörungen	U51	0.115486	Kognitive Funktionseinschränkung	R13	0.114466	Dysphagie
F06	0.0776666	Andere psychische Störungen aufgrund einer Schädigung oder Funktionsstörung des Gehirns oder einer körperlichen Krankheit	E03	0.0761155	Sonstige Hypothyreose	N18	0.0936983	Chronische Nierenkrankheit	I48	0.0910597	Vorhofflimmern und Vorhofflattern	I25	0.138432	Chronische ischämische Herzkrankheit	B96	0.11345	Sonstige näher bezeichnete Bakterien als Ursache von Krankheiten, die in anderen Kapiteln klassifiziert sind	I50	0.111372	Herzinsuffizienz	U51	0.111657	Kognitive Funktionseinschränkung
N18	0.0738695	Chronische Nierenkrankheit	I67	0.0688976	Sonstige zerebrovaskuläre Krankheiten	Z95	0.0859729	Vorhandensein von kardialen oder vaskulären Implantaten oder Transplantaten	E87	0.0895941	Sonstige Störungen des Wasser- und Elektrolythaushaltes sowie des Säure-Basen-Gleichgewichts	N18	0.13464	Chronische Nierenkrankheit	Z92	0.110348	Medizinische Behandlung in der Eigenanamnese	R29	0.100206	Sonstige Symptome, die das Nervensystem und das Muskel-Skelett-System betreffen	I50	0.110253	Herzinsuffizienz
E87	0.0669658	Sonstige Störungen des Wasser- und Elektrolythaushaltes sowie des Säure-Basen-Gleichgewichts	R29	0.0669291	Sonstige Symptome, die das Nervensystem und das Muskel-Skelett-System betreffen	G47	0.0846485	Schlafstörungen	E03	0.0862168	Sonstige Hypothyreose	Z92	0.132111	Medizinische Behandlung in der Eigenanamnese	I25	0.107467	Chronische ischämische Herzkrankheit	Z95	0.0999118	Vorhandensein von kardialen oder vaskulären Implantaten oder Transplantaten	K59	0.107444	Sonstige funktionelle Darmstörungen
G25	0.0652399	Sonstige extrapyramidale Krankheiten und Bewegungsstörungen	I50	0.0656168	Herzinsuffizienz	E03	0.0840967	Sonstige Hypothyreose	G62	0.0756388	Sonstige Polyneuropathien	K59	0.114412	Sonstige funktionelle Darmstörungen	Z45	0.0972745	Anpassung und Handhabung eines implantierten medizinischen Gerätes	R47	0.097561	Sprech- und Sprachstörungen, anderenorts nicht klassifiziert	B96	0.0990169	Sonstige näher bezeichnete Bakterien als Ursache von Krankheiten, die in anderen Kapiteln klassifiziert sind
K59	0.0628236	Sonstige funktionelle Darmstörungen	R32	0.0636483	Nicht näher bezeichnete Harninkontinenz	E86	0.0825516	Volumenmangel	I67	0.0744918	Sonstige zerebrovaskuläre Krankheiten	U51	0.107459	Kognitive Funktionseinschränkung	R29	0.0961666	Sonstige Symptome, die das Nervensystem und das Muskel-Skelett-System betreffen	E03	0.0908022	Sonstige Hypothyreose	R47	0.0983146	Sprech- und Sprachstörungen, anderenorts nicht klassifiziert
E53	0.0614429	Mangel an sonstigen Vitaminen des Vitamin-B-Komplexes	K59	0.062336	Sonstige funktionelle Darmstörungen	R29	0.0822205	Sonstige Symptome, die das Nervensystem und das Muskel-Skelett-System betreffen	Z96	0.0726439	Vorhandensein von anderen funktionellen Implantaten	I67	0.106195	Sonstige zerebrovaskuläre Krankheiten	F32	0.0915134	Depressive Episode	I67	0.0896268	Sonstige zerebrovaskuläre Krankheiten	R29	0.0948034	Sonstige Symptome, die das Nervensystem und das Muskel-Skelett-System betreffen
R29	0.0590266	Sonstige Symptome, die das Nervensystem und das Muskel-Skelett-System betreffen	N18	0.0616798	Chronische Nierenkrankheit	G62	0.0817791	Sonstige Polyneuropathien	E86	0.0716243	Volumenmangel	R29	0.102402	Sonstige Symptome, die das Nervensystem und das Muskel-Skelett-System betreffen	I48	0.0897407	Vorhofflimmern und Vorhofflattern	R13	0.0840435	Dysphagie	I67	0.0870787	Sonstige zerebrovaskuläre Krankheiten
M54	0.0586814	Rückenschmerzen	R13	0.0603675	Dysphagie	I50	0.0806754	Herzinsuffizienz	R13	0.0698401	Dysphagie	E78	0.100506	Störungen des Lipoproteinstoffwechsels und sonstige Lipidämien	N18	0.0855307	Chronische Nierenkrankheit	K59	0.0831619	Sonstige funktionelle Darmstörungen	E03	0.0842697	Sonstige Hypothyreose
N40	0.0583362	Prostatahyperplasie	Z50	0.0597113	Rehabilitationsmaßnahmen	U51	0.0801236	Kognitive Funktionseinschränkung	Z95	0.0695852	Vorhandensein von kardialen oder vaskulären Implantaten oder Transplantaten	F32	0.0973451	Depressive Episode	I50	0.081099	Herzinsuffizienz	B96	0.0828681	Sonstige näher bezeichnete Bakterien als Ursache von Krankheiten, die in anderen Kapiteln klassifiziert sind	N40	0.0842697	Prostatahyperplasie
U51	0.0566103	Kognitive Funktionseinschränkung	G25	0.0597113	Sonstige extrapyramidale Krankheiten und Bewegungsstörungen	R15	0.0750469	Stuhlinkontinenz	U51	0.0695214	Kognitive Funktionseinschränkung	R63	0.096713	Symptome, die die Nahrungs- und Flüssigkeitsaufnahme betreffen	E78	0.079548	Störungen des Lipoproteinstoffwechsels und sonstige Lipidämien	F03	0.0722892	Nicht näher bezeichnete Demenz	Z95	0.0828652	Vorhandensein von kardialen oder vaskulären Implantaten oder Transplantaten
I50	0.0514325	Herzinsuffizienz	E86	0.0570866	Volumenmangel	E53	0.0744951	Mangel an sonstigen Vitaminen des Vitamin-B-Komplexes	N18	0.0676098	Chronische Nierenkrankheit	E53	0.0809102	Mangel an sonstigen Vitaminen des Vitamin-B-Komplexes	G47	0.079548	Schlafstörungen	N40	0.0681751	Prostatahyperplasie	L89	0.0639045	Dekubitalgeschwür und Druckzone
G63	0.0500518	Polyneuropathie bei anderenorts klassifizierten Krankheiten	N40	0.0570866	Prostatahyperplasie	N40	0.0730604	Prostatahyperplasie	M54	0.0674186	Rückenschmerzen	Z96	0.0802781	Vorhandensein von anderen funktionellen Implantaten	E03	0.0764458	Sonstige Hypothyreose	L89	0.0593594	Dekubitalgeschwür und Druckzone	F03	0.0582865	Nicht näher bezeichnete Demenz
Z50	0.0483259	Rehabilitationsmaßnahmen	U51	0.0564304	Kognitive Funktionseinschränkung	M54	0.0722878	Rückenschmerzen	E53	0.0655069	Mangel an sonstigen Vitaminen des Vitamin-B-Komplexes	F05	0.0752212	Delir, nicht durch Alkohol oder andere psychotrope Substanzen bedingt	E53	0.0748947	Mangel an sonstigen Vitaminen des Vitamin-B-Komplexes	G62	0.0590655	Sonstige Polyneuropathien	G62	0.0554775	Sonstige Polyneuropathien
Z86	0.0476355	Bestimmte andere Krankheiten in der Eigenanamnese	G62	0.0511811	Sonstige Polyneuropathien	R13	0.0700806	Dysphagie	I50	0.0640413	Herzinsuffizienz	Z43	0.0752212	Versorgung künstlicher Körperöffnungen	I67	0.0704631	Sonstige zerebrovaskuläre Krankheiten	R63	0.0511314	Symptome, die die Nahrungs- und Flüssigkeitsaufnahme betreffen	F06	0.0533708	Andere psychische Störungen aufgrund einer Schädigung oder Funktionsstörung des Gehirns oder einer körperlichen Krankheit
Z96	0.0459096	Vorhandensein von anderen funktionellen Implantaten	Z96	0.0479003	Vorhandensein von anderen funktionellen Implantaten	Z96	0.0690873	Vorhandensein von anderen funktionellen Implantaten	N40	0.0625757	Prostatahyperplasie	Z95	0.0745891	Vorhandensein von kardialen oder vaskulären Implantaten oder Transplantaten	Z43	0.066253	Versorgung künstlicher Körperöffnungen	R42	0.0505436	Schwindel und Taumel	R44	0.0533708	Sonstige Symptome, die die Sinneswahrnehmungen und das Wahrnehmungsvermögen betreffen
R32	0.0441836	Nicht näher bezeichnete Harninkontinenz	I95	0.0472441	Hypotonie	G63	0.0625759	Polyneuropathie bei anderenorts klassifizierten Krankheiten	R15	0.0625119	Stuhlinkontinenz	E03	0.0707965	Sonstige Hypothyreose	Z95	0.0658099	Vorhandensein von kardialen oder vaskulären Implantaten oder Transplantaten	G47	0.0493682	Schlafstörungen	Z96	0.0519663	Vorhandensein von anderen funktionellen Implantaten
Z85	0.0431481	Bösartige Neubildung in der Eigenanamnese	M54	0.0452756	Rückenschmerzen	G25	0.0620241	Sonstige extrapyramidale Krankheiten und Bewegungsstörungen	B96	0.0587523	Sonstige näher bezeichnete Bakterien als Ursache von Krankheiten, die in anderen Kapiteln klassifiziert sind	I69	0.0619469	Folgen einer zerebrovaskulären Krankheit	R63	0.0624862	Symptome, die die Nahrungs- und Flüssigkeitsaufnahme betreffen	I11	0.0481928	Hypertensive Herzkrankheit	K29	0.0505618	Gastritis und Duodenitis
R42	0.0421125	Schwindel und Taumel	N31	0.0452756	Neuromuskuläre Dysfunktion der Harnblase, anderenorts nicht klassifiziert	B96	0.0593753	Sonstige näher bezeichnete Bakterien als Ursache von Krankheiten, die in anderen Kapiteln klassifiziert sind	R44	0.0574141	Sonstige Symptome, die die Sinneswahrnehmungen und das Wahrnehmungsvermögen betreffen	J18	0.0581542	Pneumonie, Erreger nicht näher bezeichnet	R44	0.0624862	Sonstige Symptome, die die Sinneswahrnehmungen und das Wahrnehmungsvermögen betreffen	R53	0.0473112	Unwohlsein und Ermüdung	E53	0.0477528	Mangel an sonstigen Vitaminen des Vitamin-B-Komplexes
R13	0.0407318	Dysphagie	M81	0.0426509	Osteoporose ohne pathologische Fraktur	M81	0.0561748	Osteoporose ohne pathologische Fraktur	I95	0.0545466	Hypotonie	J69	0.0581542	Pneumonie durch feste und flüssige Substanzen	U51	0.059384	Kognitive Funktionseinschränkung	Z96	0.0446665	Vorhandensein von anderen funktionellen Implantaten	R53	0.0477528	Unwohlsein und Ermüdung
I95	0.0403866	Hypotonie	B96	0.0419948	Sonstige näher bezeichnete Bakterien als Ursache von Krankheiten, die in anderen Kapiteln klassifiziert sind	I95	0.0505463	Hypotonie	M81	0.0461989	Osteoporose ohne pathologische Fraktur	Z99	0.0581542	Langzeitige Abhängigkeit von unterstützenden Apparaten, medizinischen Geräten oder Hilfsmitteln, anderenorts nicht klassifiziert	Z99	0.0591624	Langzeitige Abhängigkeit von unterstützenden Apparaten, medizinischen Geräten oder Hilfsmitteln, anderenorts nicht klassifiziert	I69	0.0431972	Folgen einer zerebrovaskulären Krankheit	Z86	0.0470506	Bestimmte andere Krankheiten in der Eigenanamnese
E86	0.0393511	Volumenmangel	R42	0.0413386	Schwindel und Taumel	Z86	0.0453592	Bestimmte andere Krankheiten in der Eigenanamnese	R52	0.0459441	Schmerz, anderenorts nicht klassifiziert	N40	0.05689	Prostatahyperplasie	Z29	0.0591624	Notwendigkeit von anderen prophylaktischen Maßnahmen	F01	0.0426095	Vaskuläre Demenz	F01	0.0470506	Vaskuläre Demenz
E66	0.0365896	Adipositas	Z86	0.0413386	Bestimmte andere Krankheiten in der Eigenanamnese	Z50	0.044366	Rehabilitationsmaßnahmen	G63	0.0412923	Polyneuropathie bei anderenorts klassifizierten Krankheiten	M81	0.0549937	Osteoporose ohne pathologische Fraktur	G62	0.0584977	Sonstige Polyneuropathien	F06	0.0426095	Andere psychische Störungen aufgrund einer Schädigung oder Funktionsstörung des Gehirns oder einer körperlichen Krankheit	I11	0.0456461	Hypertensive Herzkrankheit
M81	0.0345185	Osteoporose ohne pathologische Fraktur	G63	0.0413386	Polyneuropathie bei anderenorts klassifizierten Krankheiten	E66	0.0393996	Adipositas	Z29	0.0404639	Notwendigkeit von anderen prophylaktischen Maßnahmen	G47	0.0543616	Schlafstörungen	F05	0.0529581	Delir, nicht durch Alkohol oder andere psychotrope Substanzen bedingt	G25	0.0420217	Sonstige extrapyramidale Krankheiten und Bewegungsstörungen	G47	0.0442416	Schlafstörungen
E79	0.0314118	Störungen des Purin- und Pyrimidinstoffwechsels	Z11	0.0406824	Spezielle Verfahren zur Untersuchung auf infektiöse und parasitäre Krankheiten	R44	0.0380753	Sonstige Symptome, die die Sinneswahrnehmungen und das Wahrnehmungsvermögen betreffen	Z50	0.0403365	Rehabilitationsmaßnahmen	G62	0.0537295	Sonstige Polyneuropathien	I95	0.0516286	Hypotonie	K29	0.0420217	Gastritis und Duodenitis	R63	0.0442416	Symptome, die die Nahrungs- und Flüssigkeitsaufnahme betreffen
M47	0.0310666	Spondylose	Z29	0.0387139	Notwendigkeit von anderen prophylaktischen Maßnahmen	I69	0.0378545	Folgen einer zerebrovaskulären Krankheit	Z45	0.0386159	Anpassung und Handhabung eines implantierten medizinischen Gerätes	R44	0.0537295	Sonstige Symptome, die die Sinneswahrnehmungen und das Wahrnehmungsvermögen betreffen	N40	0.0494128	Prostatahyperplasie	E53	0.041434	Mangel an sonstigen Vitaminen des Vitamin-B-Komplexes	Z85	0.0435393	Bösartige Neubildung in der Eigenanamnese
B96	0.0307214	Sonstige näher bezeichnete Bakterien als Ursache von Krankheiten, die in anderen Kapiteln klassifiziert sind	Z85	0.0374016	Bösartige Neubildung in der Eigenanamnese	M47	0.0367509	Spondylose	M47	0.0382973	Spondylose	Z29	0.0530973	Notwendigkeit von anderen prophylaktischen Maßnahmen	M54	0.0474186	Rückenschmerzen	Z86	0.0411402	Bestimmte andere Krankheiten in der Eigenanamnese	M81	0.0435393	Osteoporose ohne pathologische Fraktur
M48	0.0293407	Sonstige Spondylopathien	E79	0.0367454	Störungen des Purin- und Pyrimidinstoffwechsels	E79	0.0361991	Störungen des Purin- und Pyrimidinstoffwechsels	Z86	0.0352386	Bestimmte andere Krankheiten in der Eigenanamnese	B95	0.0524652	Streptokokken und Staphylokokken als Ursache von Krankheiten, die in anderen Kapiteln klassifiziert sind	B95	0.0469754	Streptokokken und Staphylokokken als Ursache von Krankheiten, die in anderen Kapiteln klassifiziert sind	M54	0.0402586	Rückenschmerzen	G20	0.0407303	Primäres Parkinson-Syndrom
J44	0.0289955	Sonstige chronische obstruktive Lungenkrankheit	R44	0.0354331	Sonstige Symptome, die die Sinneswahrnehmungen und das Wahrnehmungsvermögen betreffen	F33	0.0357576	Rezidivierende depressive Störung	Z99	0.0340916	Langzeitige Abhängigkeit von unterstützenden Apparaten, medizinischen Geräten oder Hilfsmitteln, anderenorts nicht klassifiziert	N30	0.0505689	Zystitis	G24	0.0436517	Dystonie	J44	0.0399647	Sonstige chronische obstruktive Lungenkrankheit	I69	0.0400281	Folgen einer zerebrovaskulären Krankheit
F33	0.02796	Rezidivierende depressive Störung	R15	0.0328084	Stuhlinkontinenz	M48	0.0355369	Sonstige Spondylopathien	G24	0.0325623	Dystonie	I95	0.0499368	Hypotonie	M81	0.0432085	Osteoporose ohne pathologische Fraktur	M81	0.0390832	Osteoporose ohne pathologische Fraktur	J44	0.0400281	Sonstige chronische obstruktive Lungenkrankheit
I11	0.0276148	Hypertensive Herzkrankheit	I11	0.0314961	Hypertensive Herzkrankheit	J44	0.0349851	Sonstige chronische obstruktive Lungenkrankheit	E79	0.0321162	Störungen des Purin- und Pyrimidinstoffwechsels	F03	0.0493047	Nicht näher bezeichnete Demenz	N30	0.0381121	Zystitis	E79	0.0387893	Störungen des Purin- und Pyrimidinstoffwechsels	F05	0.0393258	Delir, nicht durch Alkohol oder andere psychotrope Substanzen bedingt
Z11	0.026234	Spezielle Verfahren zur Untersuchung auf infektiöse und parasitäre Krankheiten	Y57	0.0295276	Unerwünschte Nebenwirkungen bei therapeutischer Anwendung von Arzneimitteln und Drogen	Z85	0.0348747	Bösartige Neubildung in der Eigenanamnese	F33	0.0315427	Rezidivierende depressive Störung	J44	0.0486726	Sonstige chronische obstruktive Lungenkrankheit	G40	0.0374474	Epilepsie	Z03	0.0361446	Ärztliche Beobachtung und Beurteilung von Verdachtsfällen	Z11	0.0379213	Spezielle Verfahren zur Untersuchung auf infektiöse und parasitäre Krankheiten
R15	0.0258889	Stuhlinkontinenz	E66	0.0282152	Adipositas	F03	0.0329986	Nicht näher bezeichnete Demenz	M48	0.031479	Sonstige Spondylopathien	M62	0.0486726	Sonstige Muskelkrankheiten	J69	0.0372258	Pneumonie durch feste und flüssige Substanzen	G63	0.0358507	Polyneuropathie bei anderenorts klassifizierten Krankheiten	N30	0.0372191	Zystitis
